# Supplementary material for: Association between Serum Zinc Levels and Clinical Index or the Body Composition in Incident Hemodialysis Patients
Source: MDPI journal article supplement (doi:10.3390/nu12103187), 2020-10-19
Supplement: s1 [file s1]

# Supplementary Materials:

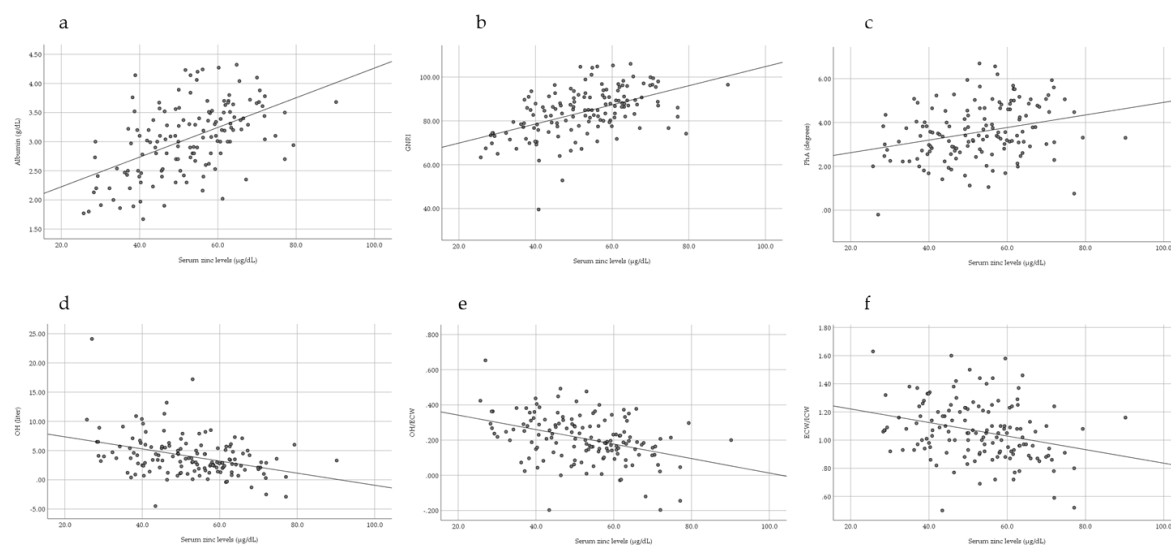

**Figure S1.** Relationships between serum zinc levels and serum albumin levels (a), GNRI (b), PhA (c), OH (d), OH/ECW (e), and ECW/ICW (f).
